# Supplementary material for: Acacia catechu Willd. Extract Protects Neuronal Cells from Oxidative Stress-Induced Damage
Source: MDPI journal article supplement (doi:10.3390/antiox11010081), 2021-12-29
Supplement: s1 [file s1]

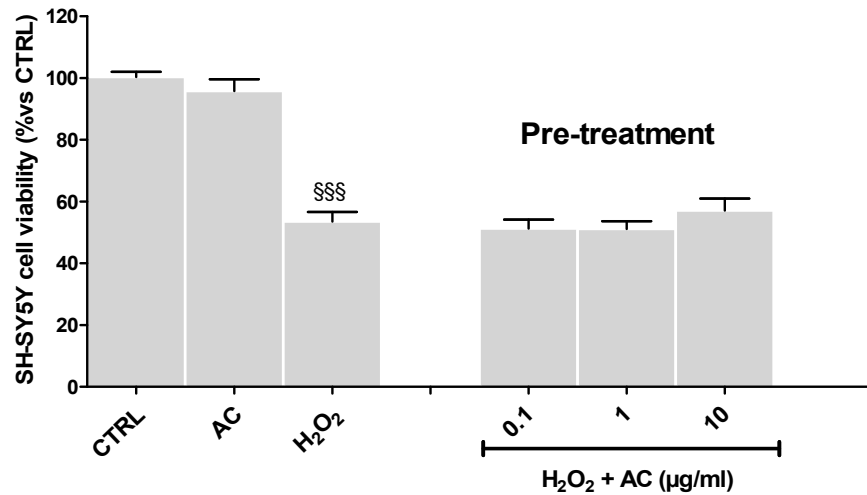

**Figure S1.** Effects of AC on oxidative stress (OS)-induced cytotoxicity in SH-SY5Y cells. Cells were treated with AC (0.1-10 µg/mL) according to the pre-treatment protocol described in Materials and Methods. OS was reproduced by using H<sub>2</sub>O<sub>2</sub> (25 µM for 1 h + 24 h with medium). Data are reported as means ± SEMs. <sup>\*\*\*</sup>  $p < 0.01$ , vs. untreated cells (CTRL)(ANOVA and Bonferroni post-test).

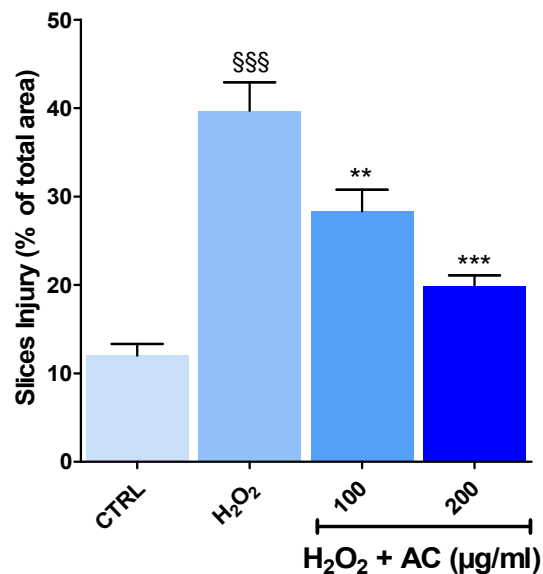

**Figure S2.** Effects of AC on OS-induced reduction in rat brain slices viability. Slices were incubated with artificial cerebrospinal fluid (ACSF) (controls) or ACSF + AC for 1 h. Afterward, AC was maintained and H<sub>2</sub>O<sub>2</sub> (5 mM for 1 h) was added. Viability was expressed as area of the injury vs total area of the slice, as calculated by using ImageJ software. Data are reported as means ± SEMs. <sup>\*\*\*</sup>  $p < 0.001$ , vs. untreated slices (CTRL); <sup>\*\*</sup>  $p < 0.01$ , <sup>\*\*\*</sup>  $p < 0.001$  vs. H<sub>2</sub>O<sub>2</sub> (ANOVA followed by Bonferroni post-test).

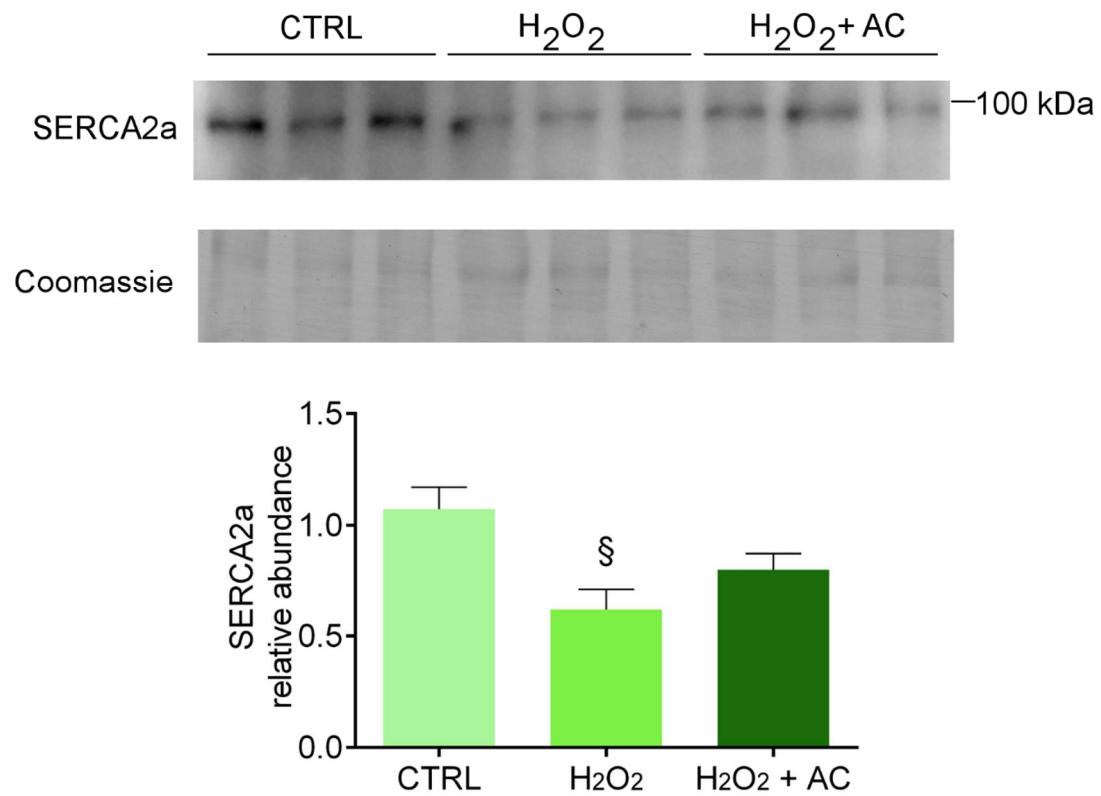

**Figure S3.** The H<sub>2</sub>O<sub>2</sub>-induced depletion of SERCA2a is only partially rescued by AC treatment. Protein lysates derived from rat brain slices (treated as described in Materials and Methods) were analyzed by WB using antibodies against SERCA2a. The upper panel shows a representative WB and the Coomassie blue staining of the membrane, while the bar diagram shows the densitometric analysis of SERCA2a immunoreactive bands normalized to the optical density of the corresponding Coomassie-stained lane. Data are reported as means  $\pm$  SEMs. §  $p < 0.05$  vs CTRL (ANOVA followed by Holm Sidak's multiple comparison test).

**Table S1** - Altered proteins in rat brain slices treated with H<sub>2</sub>O<sub>2</sub> or H<sub>2</sub>O<sub>2</sub>+AC 200 µg/mL.

| Gene name | Var ID (Primary) | Protein name                                                    | mean value |                               |                                   | SEMs |                               |                                   | p-value                               |                                                                    |
|-----------|------------------|-----------------------------------------------------------------|------------|-------------------------------|-----------------------------------|------|-------------------------------|-----------------------------------|---------------------------------------|--------------------------------------------------------------------|
|           |                  |                                                                 | CTRL       | H <sub>2</sub> O <sub>2</sub> | H <sub>2</sub> O <sub>2</sub> +AC | CTRL | H <sub>2</sub> O <sub>2</sub> | H <sub>2</sub> O <sub>2</sub> +AC | CTRL vs H <sub>2</sub> O <sub>2</sub> | H <sub>2</sub> O <sub>2</sub> vs H <sub>2</sub> O <sub>2</sub> +AC |
| Usp5      | D3ZVQ0           | Ubiquitin carboxyl-terminal hydrolase                           | 1,00       | 1,36                          | 1,11                              | 0,09 | 0,00                          | 0,09                              | 0,0003                                | 0,0340                                                             |
| H2afx     | D3ZXP3           | Histone H2A                                                     | 1,00       | 1,19                          | 1,06                              | 0,04 | 0,04                          | 0,05                              | 0,0140                                | 0,0407                                                             |
| Syng3     | D4ABK1           | Synaptogyrin 3                                                  | 1,00       | 1,33                          | 1,11                              | 0,03 | 0,09                          | 0,11                              | 0,0103                                | 0,0477                                                             |
| Sh3gl1    | O35964           | Endophilin-A2                                                   | 1,00       | 1,30                          | 0,99                              | 0,05 | 0,04                          | 0,01                              | 0,0030                                | 0,0067                                                             |
| Syn1      | P09951           | Synapsin-1                                                      | 1,00       | 1,15                          | 0,94                              | 0,05 | 0,02                          | 0,07                              | 0,0386                                | 0,0278                                                             |
| Cox4i1    | P10888           | Cytochrome c oxidase subunit 4 isoform 1, mitochondrial         | 1,00       | 1,17                          | 1,01                              | 0,04 | 0,01                          | 0,03                              | 0,0029                                | 0,0034                                                             |
| Fh        | P14408           | Fumarate hydratase, mitochondrial                               | 1,00       | 1,46                          | 1,12                              | 0,07 | 0,07                          | 0,10                              | 0,0022                                | 0,0150                                                             |
| Anxa5     | P14668           | Annexin A5                                                      | 1,00       | 1,24                          | 0,88                              | 0,04 | 0,02                          | 0,16                              | 0,0457                                | 0,0229                                                             |
| Sptan1    | P16086           | Spectrin alpha chain, non-erythrocytic 1                        | 1,00       | 1,23                          | 1,05                              | 0,04 | 0,04                          | 0,07                              | 0,0202                                | 0,0265                                                             |
| Gria2     | P19491           | Glutamate receptor 2                                            | 1,00       | 1,41                          | 1,13                              | 0,03 | 0,08                          | 0,13                              | 0,0026                                | 0,0182                                                             |
| Atp5pf    | P21571           | ATP synthase-coupling factor 6, mitochondrial                   | 1,00       | 1,38                          | 1,12                              | 0,05 | 0,01                          | 0,10                              | 0,0111                                | 0,0330                                                             |
| Pcmt1     | P22062           | Protein-L-isoaspartate(D-aspartate) O-methyltransferase         | 1,00       | 1,27                          | 1,06                              | 0,07 | 0,04                          | 0,09                              | 0,0238                                | 0,0401                                                             |
| Fabp7     | P55051           | Fatty acid-binding protein, brain                               | 1,00       | 1,24                          | 1,12                              | 0,02 | 0,05                          | 0,04                              | 0,0016                                | 0,0394                                                             |
| Ppp1cb    | P62142           | Serine/threonine-protein phosphatase PP1-beta catalytic subunit | 1,00       | 1,20                          | 1,05                              | 0,07 | 0,04                          | 0,07                              | 0,0254                                | 0,0340                                                             |
| Add2      | Q05764           | Beta-adducin                                                    | 1,00       | 1,17                          | 1,00                              | 0,03 | 0,05                          | 0,05                              | 0,0269                                | 0,0269                                                             |
| Cnrip1    | Q5M7A7           | CB1 cannabinoid receptor-interacting protein 1                  | 1,00       | 1,22                          | 1,01                              | 0,06 | 0,05                          | 0,08                              | 0,0483                                | 0,0483                                                             |
| Ptprz1    | Q62656           | Receptor-type tyrosine-protein phosphatase zeta                 | 1,00       | 1,12                          | 0,97                              | 0,03 | 0,04                          | 0,04                              | 0,0253                                | 0,0160                                                             |
| Septin9   | Q9QZR6           | Septin-9                                                        | 1,00       | 1,33                          | 0,93                              | 0,14 | 0,07                          | 0,27                              | 0,0476                                | 0,0150                                                             |
| Ckm       | P00564           | Creatine kinase M-type                                          | 1,00       | 1,48                          | 1,47                              | 0,10 | 0,18                          | 0,09                              | 0,0186                                | 0,5910                                                             |
| Thy1      | P01830           | Thy-1 membrane glycoprotein                                     | 1,00       | 1,13                          | 1,06                              | 0,03 | 0,02                          | 0,05                              | 0,0383                                | 0,2885                                                             |
| Napa      | P54921           | Alpha-soluble NSF attachment protein                            | 1,00       | 1,12                          | 1,12                              | 0,03 | 0,01                          | 0,05                              | 0,0169                                | 0,4522                                                             |
| Idh2      | P56574           | Isocitrate dehydrogenase [NADP], mitochondrial                  | 1,00       | 1,67                          | 1,32                              | 0,14 | 0,12                          | 0,12                              | 0,0080                                | 0,0539                                                             |
| Pcp4      | P63055           | Calmodulin regulator protein PCP4                               | 1,00       | 0,61                          | 0,72                              | 0,10 | 0,04                          | 0,24                              | 0,0156                                | 0,4304                                                             |

Data are reported as means ± SEMs. The *p*-value was calculated according to ANOVA followed by Dunnet's post hoc test. In light blue, proteins whose abundance was not reverted by AC (*p* > 0.05).

**Table S2.** Enrichment analysis of proteins whose expression whose reverted by AC in rat brain slices. Statistically significant Gene Ontology (GO) terms are reported in dark blue

| Term                                                                 | p-value | Adjusted p-value | Odds ratio | Combined score | Genes                             |
|----------------------------------------------------------------------|---------|------------------|------------|----------------|-----------------------------------|
| exocytic vesicle membrane (GO:0099501)                               | 0,001   | 0,049            | 39,32      | 255,68         | SYNGR3;SYN1                       |
| synaptic vesicle membrane (GO:0030672)                               | 0,001   | 0,049            | 39,32      | 255,68         | SYNGR3;SYN1                       |
| extracellular membrane-bounded organelle (GO:0065010)                | 0,003   | 0,050            | 28,37      | 167,01         | PCMT1;SPTAN1                      |
| extracellular vesicle (GO:1903561)                                   | 0,003   | 0,050            | 26,88      | 155,43         | PCMT1;SPTAN1                      |
| mitochondrial membrane (GO:0031966)                                  | 0,004   | 0,051            | 6,99       | 38,76          | ATP5PF;COX4I1;OGDH;SDHA           |
| oxoglutarate dehydrogenase complex (GO:0045252)                      | 0,007   | 0,058            | 184,89     | 917,89         | OGDH                              |
| cytoskeleton (GO:0005856)                                            | 0,009   | 0,058            | 5,42       | 25,37          | SEPTIN9;SPTAN1;SYN1;ADD2          |
| PTW/PP1 phosphatase complex (GO:0072357)                             | 0,010   | 0,058            | 123,25     | 570,56         | PPP1CB                            |
| mitochondrial inner membrane (GO:0005743)                            | 0,011   | 0,058            | 7,25       | 33,00          | ATP5PF;COX4I1;SDHA                |
| microtubule cytoskeleton (GO:0015630)                                | 0,011   | 0,058            | 7,19       | 32,52          | CCT7;SEPTIN9;SPTAN1               |
| protein serine/threonine phosphatase complex (GO:0008287)            | 0,011   | 0,058            | 105,63     | 475,00         | PPP1CB                            |
| neuron to neuron synapse (GO:0098984)                                | 0,011   | 0,058            | 105,63     | 475,00         | GRIA2                             |
| organelle inner membrane (GO:0019866)                                | 0,012   | 0,058            | 6,87       | 30,26          | ATP5PF;COX4I1;SDHA                |
| mitochondrial matrix (GO:0005759)                                    | 0,012   | 0,058            | 6,83       | 29,97          | FH;IDH2;OGDH                      |
| mitochondrial respiratory chain complex IV (GO:0005751)              | 0,014   | 0,059            | 82,15      | 351,18         | COX4I1                            |
| asymmetric synapse (GO:0032279)                                      | 0,015   | 0,059            | 11,65      | 49,07          | GRIA2;ADD2                        |
| postsynaptic density (GO:0014069)                                    | 0,016   | 0,059            | 11,22      | 46,47          | GRIA2;ADD2                        |
| focal adhesion (GO:0005925)                                          | 0,016   | 0,059            | 6,12       | 25,14          | PPP1CB;ANXA5;THY1                 |
| cell-substrate junction (GO:0030055)                                 | 0,017   | 0,059            | 6,01       | 24,40          | PPP1CB;ANXA5;THY1                 |
| septin cytoskeleton (GO:0032156)                                     | 0,019   | 0,060            | 56,86      | 224,10         | SEPTIN9                           |
| septin ring (GO:0005940)                                             | 0,019   | 0,060            | 56,86      | 224,10         | SEPTIN9                           |
| proton-transporting ATP synthase complex (GO:0045259)                | 0,021   | 0,061            | 52,80      | 204,47         | ATP5PF                            |
| membrane raft (GO:0045121)                                           | 0,022   | 0,061            | 9,47       | 36,25          | THY1;ADD2                         |
| mitochondrial proton-transporting ATP synthase complex (GO:0005743)  | 0,025   | 0,067            | 43,47      | 160,53         | ATP5PF                            |
| microtubule (GO:0005874)                                             | 0,027   | 0,067            | 8,46       | 30,66          | CCT7;SEPTIN9                      |
| AMPA glutamate receptor complex (GO:0032281)                         | 0,028   | 0,067            | 38,89      | 139,57         | GRIA2                             |
| anchored component of external side of plasma membrane (GO:0031222)  | 0,028   | 0,067            | 38,89      | 139,57         | THY1                              |
| intracellular organelle lumen (GO:0070013)                           | 0,029   | 0,068            | 3,78       | 13,34          | FH;IDH2;OGDH;SPTAN1               |
| intrinsic component of external side of plasma membrane (GO:0031222) | 0,033   | 0,074            | 32,12      | 109,50         | THY1                              |
| excitatory synapse (GO:0060076)                                      | 0,034   | 0,075            | 30,78      | 103,70         | GRIA2                             |
| vesicle (GO:0031982)                                                 | 0,040   | 0,081            | 6,78       | 21,89          | PCMT1;SPTAN1                      |
| dendrite membrane (GO:0032590)                                       | 0,040   | 0,081            | 26,38      | 85,02          | THY1                              |
| non-motile cilium (GO:0097730)                                       | 0,044   | 0,084            | 23,82      | 74,49          | SEPTIN9                           |
| ionotropic glutamate receptor complex (GO:0008328)                   | 0,044   | 0,084            | 23,82      | 74,49          | GRIA2                             |
| polymeric cytoskeletal fiber (GO:0099513)                            | 0,050   | 0,092            | 5,97       | 17,94          | CCT7;SEPTIN9                      |
| neuromuscular junction (GO:0031594)                                  | 0,052   | 0,094            | 19,95      | 59,04          | SYNGR3                            |
| dendrite (GO:0030425)                                                | 0,055   | 0,096            | 5,66       | 16,45          | GRIA2;THY1                        |
| vacuolar membrane (GO:0005774)                                       | 0,061   | 0,104            | 16,77      | 46,87          | NAPA                              |
| anchored component of plasma membrane (GO:0046658)                   | 0,062   | 0,104            | 16,40      | 45,48          | THY1                              |
| tertiary granule lumen (GO:1904724)                                  | 0,074   | 0,121            | 13,66      | 35,52          | SPTAN1                            |
| specific granule lumen (GO:0035580)                                  | 0,083   | 0,132            | 12,09      | 30,04          | SPTAN1                            |
| glutamatergic synapse (GO:0098978)                                   | 0,092   | 0,143            | 10,84      | 25,83          | SH3GL1                            |
| cation channel complex (GO:0034703)                                  | 0,097   | 0,147            | 10,24      | 23,84          | GRIA2                             |
| plasma membrane raft (GO:0044853)                                    | 0,109   | 0,161            | 9,10       | 20,18          | ADD2                              |
| platelet alpha granule (GO:0031091)                                  | 0,119   | 0,171            | 8,27       | 17,63          | STXBP1                            |
| mitochondrial envelope (GO:0005740)                                  | 0,163   | 0,231            | 5,83       | 10,57          | OGDH                              |
| neuron projection (GO:0043005)                                       | 0,182   | 0,252            | 2,70       | 4,59           | GRIA2;THY1                        |
| endocytic vesicle membrane (GO:0030666)                              | 0,199   | 0,267            | 4,67       | 7,54           | GRIA2                             |
| specific granule (GO:0042581)                                        | 0,202   | 0,267            | 4,62       | 7,39           | SPTAN1                            |
| tertiary granule (GO:0070820)                                        | 0,206   | 0,268            | 4,50       | 7,11           | SPTAN1                            |
| intracellular non-membrane-bounded organelle (GO:0043232)            | 0,219   | 0,279            | 1,96       | 2,97           | SDHA;SYN1;ADD2                    |
| endocytic vesicle (GO:0030139)                                       | 0,234   | 0,292            | 3,90       | 5,67           | GRIA2                             |
| lytic vacuole (GO:0000323)                                           | 0,265   | 0,326            | 3,36       | 4,45           | USP5                              |
| cilium (GO:0005929)                                                  | 0,284   | 0,342            | 3,10       | 3,90           | SEPTIN9                           |
| bounding membrane of organelle (GO:0098588)                          | 0,292   | 0,345            | 1,93       | 2,38           | NAPA;GRIA2                        |
| integral component of plasma membrane (GO:0005887)                   | 0,333   | 0,387            | 1,53       | 1,68           | GRIA2;PTPRZ1;THY1                 |
| actin cytoskeleton (GO:0015629)                                      | 0,360   | 0,403            | 2,31       | 2,36           | SEPTIN9                           |
| secretory granule lumen (GO:0034774)                                 | 0,360   | 0,403            | 2,31       | 2,36           | SPTAN1                            |
| collagen-containing extracellular matrix (GO:0062023)                | 0,416   | 0,450            | 1,91       | 1,68           | ANXA5                             |
| cytoplasmic vesicle membrane (GO:0030659)                            | 0,416   | 0,450            | 1,91       | 1,68           | GRIA2                             |
| lysosome (GO:0005764)                                                | 0,492   | 0,524            | 1,52       | 1,08           | USP5                              |
| nucleolus (GO:0005730)                                               | 0,649   | 0,676            | 0,97       | 0,42           | SDHA                              |
| nuclear lumen (GO:0031981)                                           | 0,655   | 0,676            | 0,96       | 0,41           | SDHA                              |
| intracellular membrane-bounded organelle (GO:0043231)                | 0,772   | 0,785            | 0,78       | 0,20           | PPP1CB;PCP4;USP5;OGDH;SPTAN1;PFKP |
| nucleus (GO:0005634)                                                 | 0,785   | 0,785            | 0,75       | 0,18           | PPP1CB;PCP4;USP5;OGDH;PFKP        |
